# Supplementary material for: Proteolytically cleaved MLL subunits are susceptible to distinct degradation pathways
Source: Oxford University Press journal article supplement (doi:10.1242/jcs.080523), 2011-06-13

# Figure S2

## MLL mutants that do not associate with MLL<sup>C</sup> can interact with HCF-1.

A. Schematic representation of the mutants. Predicted molecular mass of each mutant is shown on the right.

B. IP-western blot analysis was performed for various MLL 1/2254 mutants that do not associate with MLL<sup>C</sup>. MLL 1/2254 mutants were transiently expressed in 293T cells. The cell extracts were subjected to immunoprecipitation (IP) with anti-HA (3F10) antibody followed by immunoblotting. The precipitates and input samples indicated on the top were immunoblotted with anti-HA (top panel) or anti-HCF-1C (H12) (bottom panel) antibodies.

C. IP-western blot analysis was performed for MLL1/2254  $\Delta$ exon11 mutant as in panel B. HCF-1 binding was observed for the  $\Delta$ exon11 mutant.

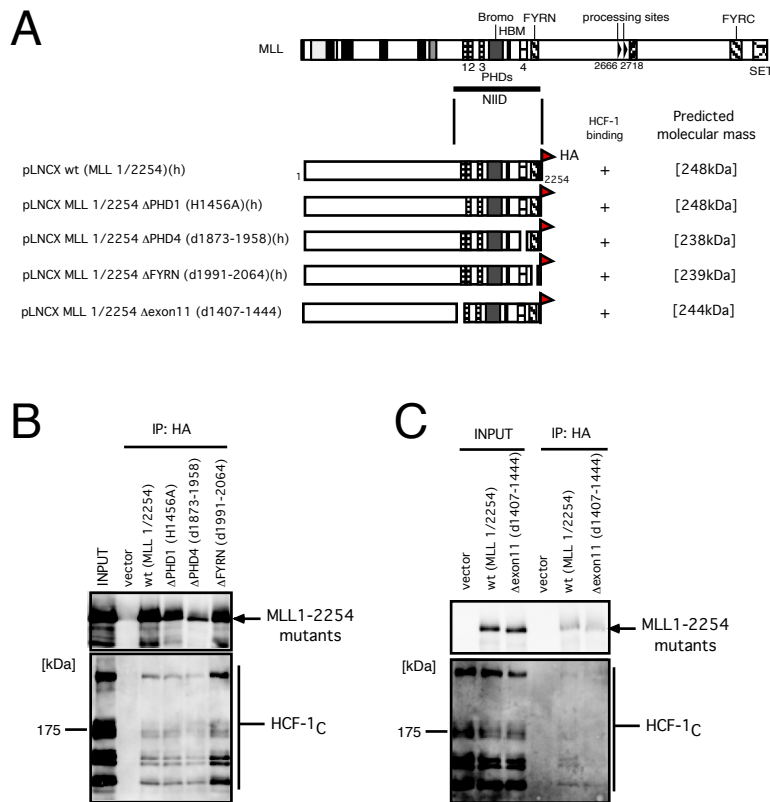

Supplement: jcs080523figs2.pdf [file jcs080523figs2.pdf]
